# Supplementary material
Source: publisher figshare collection journal article supplement (https://brill.figshare.com/ndownloader/files/14530067)
Supplement: Supplementary file 1 [file 14530067]

**Molecular phylogenetic analysis and comparative morphology reveals the diversity and distribution of needle nematodes of the genus *Longidorus* (Dorylaimida: Longidoridae) from Spain**

*Antonio Archidona-Yuste*

Institute for Sustainable Agriculture (IAS), Spanish National Research Council (CSIC), Avda. Menéndez Pidal s/n, 14004 Córdoba, Spain

*Carolina Cantalapiedra-Navarrete*

Institute for Sustainable Agriculture (IAS), Spanish National Research Council (CSIC), Avda. Menéndez Pidal s/n, 14004 Córdoba, Spain

*Pablo Castillo*

Institute for Sustainable Agriculture (IAS), Spanish National Research Council (CSIC), Avda. Menéndez Pidal s/n, 14004 Córdoba, Spain

*Juan E. Palomares-Rius*

Institute for Sustainable Agriculture (IAS), Spanish National Research Council (CSIC), Avda. Menéndez Pidal s/n, 14004 Córdoba, Spain

*palomaresje@ias.csic.es*

**Supplementary material**

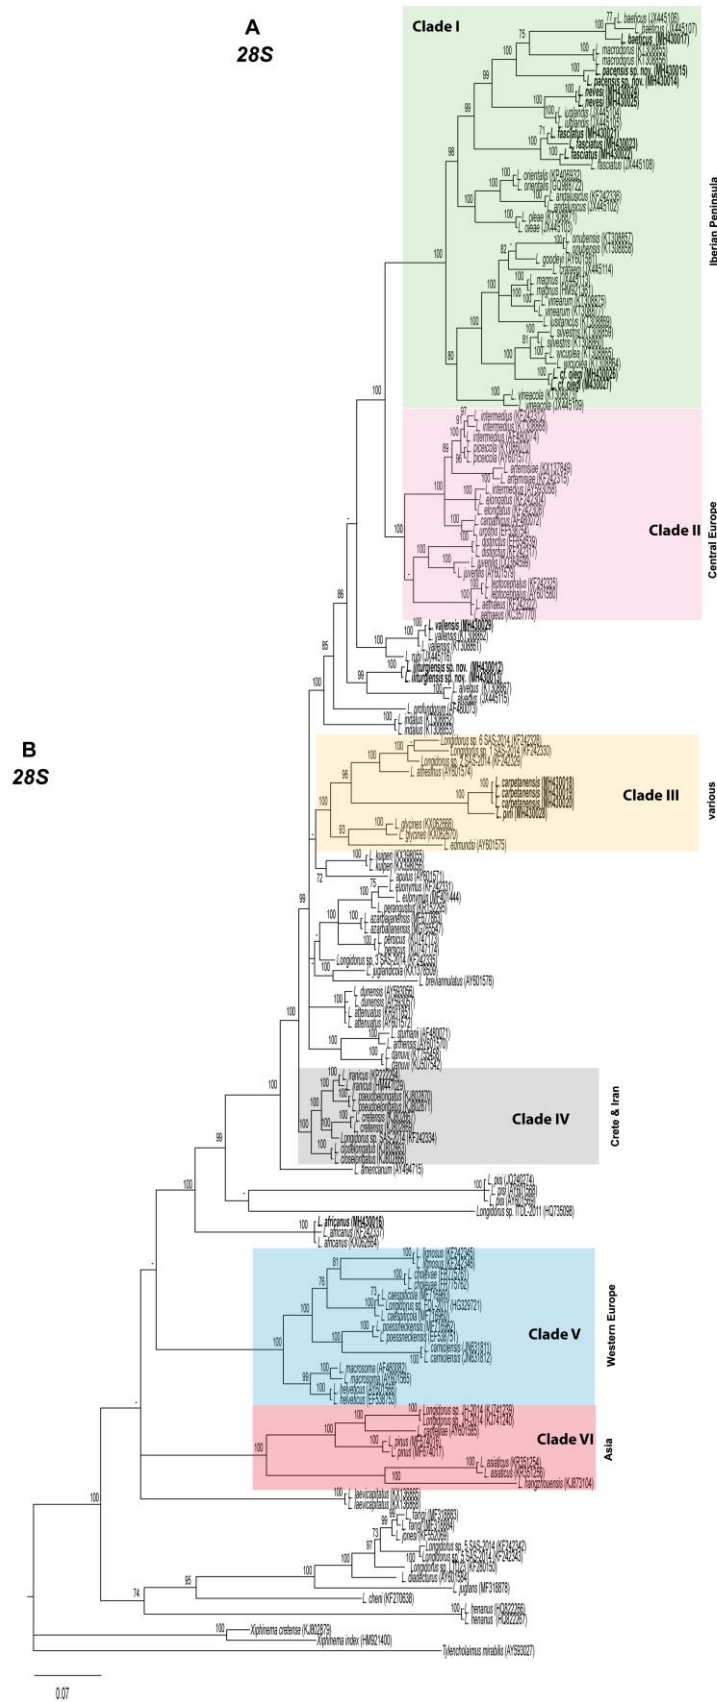

FIGURE S1. Phylogenetic relationships within the genus *Longidorus*. Bayesian 50% majority rule consensus tree as inferred from D2 and D3 expansion domains of 28S rRNA sequence alignment under an SYM model with invariable sites and a gamma-shaped distribution (SYM + I + G).

Posterior probabilities greater than 0.70 are given for appropriate clades. Newly obtained sequences in this study are shown in bold. Scale bar = expected changes per site.
